# Supplementary material for: Divergent Seasonal Reproductive Patterns in Syntopic Populations of Two Murine Species in Southern Spain, Mus spretus and Apodemus sylvaticus
Source: MDPI journal article supplement (doi:10.3390/ani11020243), 2021-01-20
Supplement: s1 [file s1]

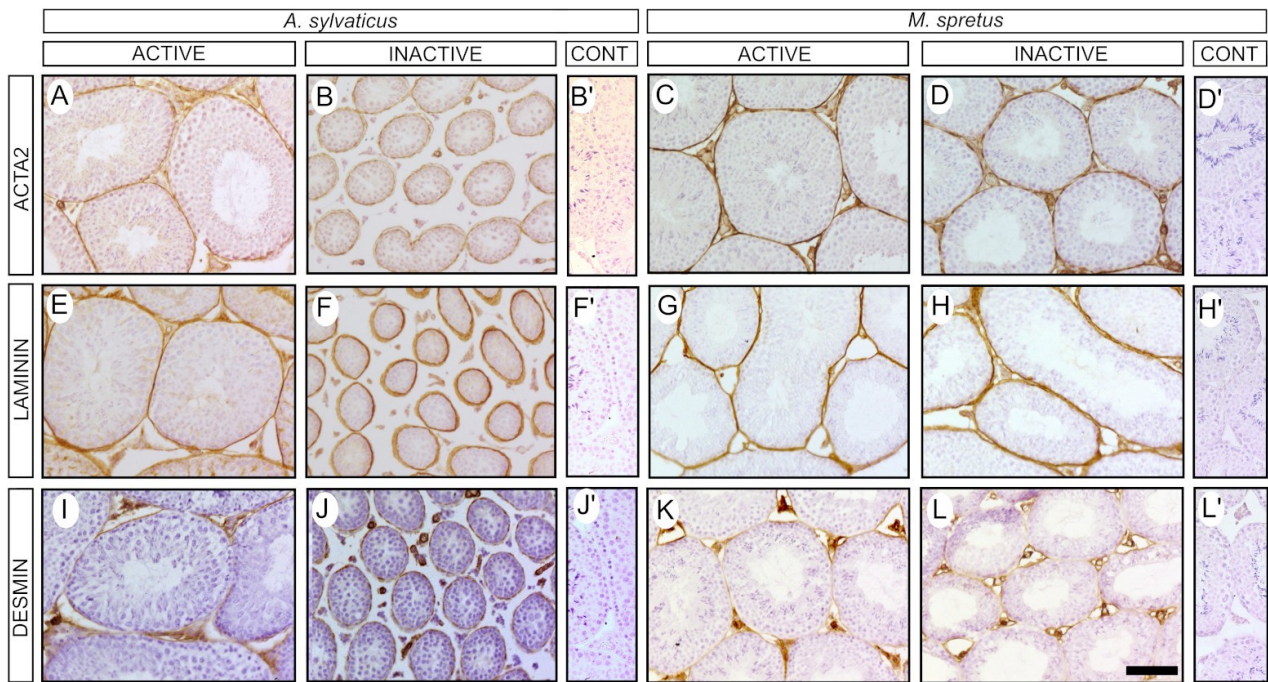

**Figure S1. Immunohistochemistry for several molecular markers of the *lamina propria* in testis sections of *A. sylvaticus* and *M. spretus*.** Immunohistochemistry for ACTA2 (A-D), LAMININ (E-H), and DESMIN (I-L) in active (A,E,I) and inactive (B,F,J) testes of *A. sylvaticus* and in active (C,G,K) and inactive (D,H,L) testes of *M. spretus*. Inserts at B',D',F',H',J',L' show negative controls. Scale bar shown in L represents 100  $\mu$ m for all the pictures.
